# Supplementary material for: Ruthenium nanoparticles-modified reduced graphene prepared by a green method for high-performance supercapacitor application in neutral electrolyte
Source: Royal Society of Chemistry journal article supplement (doi:10.1039/c6ra27415c), 2017-01-01
Supplement: c6ra27415c1.pdf [file c6ra27415c1.pdf]

Supplementary Figure (S1):

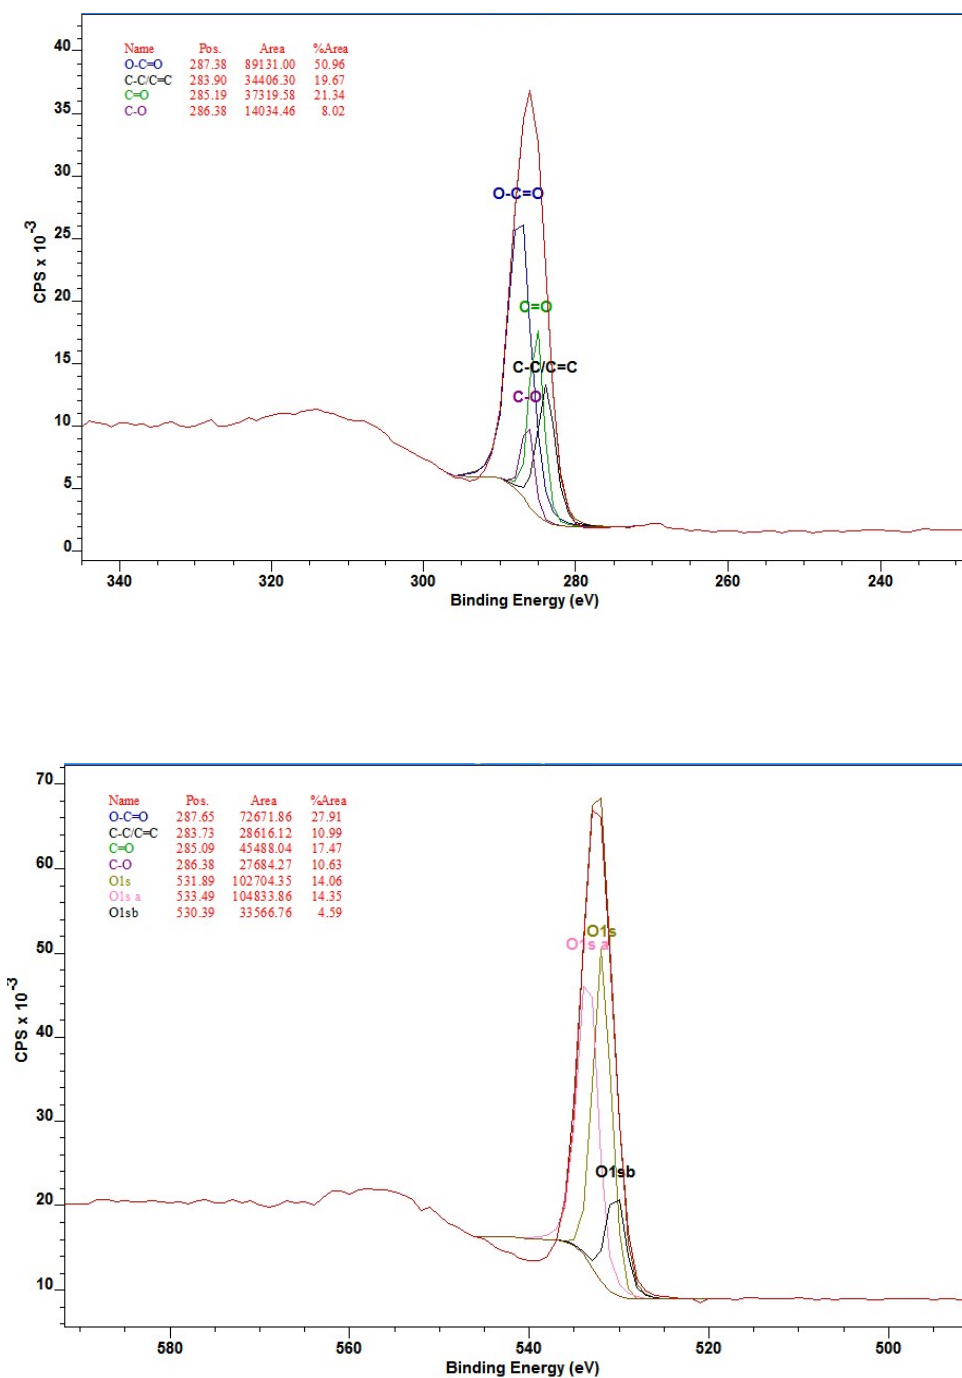

Supplementary Figure (S1) a) XPS of C1s of GO and the inset is the percentages of each deconvoluted peak regardless oxygen showing a ratio 1:4 between C=C/C-C peak and the other oxygenated peaks. B) XPS of O1s of GO and the inset is the total percentage of each peak.
